**PS Form 3526** **Statement of Ownership, Management, and Circulation**  
(All Periodicals Publications Except Requester Publications)

|                                                                                                                                                                                                                                                                                                                                                                                                                                                                                                                                                                                |                                                                                        |                                                  |                                                                           |
|--------------------------------------------------------------------------------------------------------------------------------------------------------------------------------------------------------------------------------------------------------------------------------------------------------------------------------------------------------------------------------------------------------------------------------------------------------------------------------------------------------------------------------------------------------------------------------|----------------------------------------------------------------------------------------|--------------------------------------------------|---------------------------------------------------------------------------|
| <b>1. Publication Title</b><br>AMERICAN PSYCHIATRIC ASSOCIATION/<br>AMERICAN JOURNAL OF PSYCHIATRY (THE)                                                                                                                                                                                                                                                                                                                                                                                                                                                                       | <b>2. Publication Number</b><br>20200                                                  | <b>ISSN</b><br>29530                             | <b>3. Filing Date</b><br>09/05/2024                                       |
| <b>4. Issue Frequency</b><br>MONTHLY                                                                                                                                                                                                                                                                                                                                                                                                                                                                                                                                           | <b>5. Number of Issues Published Annually</b><br>12                                    | <b>6. Annual Subscription Price</b><br>\$ 378.00 |                                                                           |
| <b>7. Complete Mailing Address of Known Office of Publication</b><br>800 MAINE AVE SW STE 900<br>WASHINGTON, VA DC 20024-2812                                                                                                                                                                                                                                                                                                                                                                                                                                                  |                                                                                        |                                                  | <b>Contact Person</b><br>BRIAN COLE<br><b>Telephone</b><br>(202) 459-9750 |
| <b>8. Complete Mailing Address of Headquarters or General Business Office of Publisher</b><br>800 MAINE AVE SW STE 900<br>WASHINGTON, DC 20024-2812                                                                                                                                                                                                                                                                                                                                                                                                                            |                                                                                        |                                                  |                                                                           |
| <b>9. Full Names and Complete Mailing Addresses of Publisher, Editor, and Managing Editor</b>                                                                                                                                                                                                                                                                                                                                                                                                                                                                                  |                                                                                        |                                                  |                                                                           |
| <b>Publisher (Name and complete mailing address)</b><br>SIMONE TAYLOR<br>800 MAINE AVE SW STE 900<br>WASHINGTON, DC 20024-2812                                                                                                                                                                                                                                                                                                                                                                                                                                                 |                                                                                        |                                                  |                                                                           |
| <b>Editor (Name and complete mailing address)</b><br>ROBERT FREEDMAN<br>800 MAINE AVE SW STE 900<br>WASHINGTON, DC 20024-2812                                                                                                                                                                                                                                                                                                                                                                                                                                                  |                                                                                        |                                                  |                                                                           |
| <b>Managing Editor (Name and complete mailing address)</b><br>MICHAEL ROY<br>800 MAINE AVE SW STE 900<br>WASHINGTON, DC 20024-2812                                                                                                                                                                                                                                                                                                                                                                                                                                             |                                                                                        |                                                  |                                                                           |
| <b>10. Owner (Do not leave blank. If the publication is owned by a corporation, give the name and address of the corporation immediately followed by the names and addresses of all stockholders owning or holding 1 percent or more of the total amount of stock. If not owned by a corporation, give names and addresses of the individual owners. If owned by a partnership or other unincorporated firm, give its name and address as well as those of each individual owner. If the publication is published by a nonprofit organization, give its name and address.)</b> |                                                                                        |                                                  |                                                                           |
| <b>Full Name</b><br>AMERICAN PSYCHIATRIC ASSN                                                                                                                                                                                                                                                                                                                                                                                                                                                                                                                                  | <b>Complete Mailing Address</b><br>800 MAINE AVE SW STE 900, WASHINGTON, DC 20024-2812 |                                                  |                                                                           |
| <b>11. Known Bondholders, Mortgagees, and Other Security Holders Owning or Holding 1 Percent or More of Total Amount of Bonds, Mortgages, or Other Securities. If none, check box</b> <input checked="" type="checkbox"/> None                                                                                                                                                                                                                                                                                                                                                 |                                                                                        |                                                  |                                                                           |
| <b>Full Name</b>                                                                                                                                                                                                                                                                                                                                                                                                                                                                                                                                                               | <b>Complete Mailing Address</b>                                                        |                                                  |                                                                           |
| <b>12. Tax Status (For completion by nonprofit organizations authorized to mail at nonprofit rates)</b><br>The purpose, function, and nonprofit status of this organization and the exempt status for federal income tax purposes:<br><input checked="" type="checkbox"/> Has Not Changed During Preceding 12 Months<br><input type="checkbox"/> Has Changed During Preceding 12 Months (Publisher must submit explanation of change with this statement)                                                                                                                      |                                                                                        |                                                  |                                                                           |

PS Form 3526, September 2007 (Page 1)

PRIVACY NOTICE: See our privacy policy on www.usps.com

|                                                                                                                                 |                                                                                                                                                                    |                                                                 |                                                                    |
|---------------------------------------------------------------------------------------------------------------------------------|--------------------------------------------------------------------------------------------------------------------------------------------------------------------|-----------------------------------------------------------------|--------------------------------------------------------------------|
| <b>13. Publication Title</b><br>AMERICAN PSYCHIATRIC ASSOCIATION/AMERICAN JOURNAL OF PSYCHIATRY (THE)                           |                                                                                                                                                                    | <b>14. Issue Date for Circulation Data Below</b><br>09/01/2024  |                                                                    |
| <b>15. Extend and Nature of Circulation</b>                                                                                     |                                                                                                                                                                    | <b>Average No. Copies Each Issue During Preceding 12 Months</b> | <b>No. Copies of Single Issue Published Nearest to Filing Date</b> |
| <b>a. Total Numbers of Copies (Net press run)</b>                                                                               |                                                                                                                                                                    | 28091                                                           | 26635                                                              |
| <b>b. Paid Circulation (By Mail and Outside the Mail)</b>                                                                       | (1) Mailed Outside County Paid Subscriptions Stated on PS Form 3541 (include paid distribution above nominal rate, advertiser's proof copies, and exchange copies) | 27671                                                           | 26276                                                              |
|                                                                                                                                 | (2) Mailed In-County Paid Subscriptions Stated on PS Form 3541 (include paid distribution above nominal rate, advertiser's proof copies, and exchange copies)      | 0                                                               | 0                                                                  |
|                                                                                                                                 | (3) Paid Distribution Outside the Mails Including Sales Through Dealers and Carriers, Street Vendors, Counter Sales, and Other Paid Distribution Outside USPS      | 0                                                               | 0                                                                  |
|                                                                                                                                 | (4) Paid Distribution by Other Classes of Mail Through the USPS (e.g. First-Class Mail)                                                                            | 0                                                               | 0                                                                  |
| <b>c. Total Paid Distribution (Sum of 15b (1), (2), (3), (4))</b>                                                               |                                                                                                                                                                    | 27671                                                           | 26276                                                              |
| <b>d. Free or Nominal Rate Distribution (By Mail and Outside the Mail)</b>                                                      | (1) Free or Nominal Rate Outside County Copies included on PS Form 3541                                                                                            | 0                                                               | 0                                                                  |
|                                                                                                                                 | (2) Free or Nominal Rate In-County Copies included on PS Form 3541                                                                                                 | 0                                                               | 0                                                                  |
|                                                                                                                                 | (3) Free or Nominal Rate Copies Mailed at Other Classes Through the USPS (e.g. First-Class Mail)                                                                   | 0                                                               | 0                                                                  |
|                                                                                                                                 | (4) Free or Nominal Rate Distribution Outside the Mail (Carriers or other means)                                                                                   | 17                                                              | 0                                                                  |
| <b>e. Total Free or Nominal Rate Distribution (Sum of 15d (1), (2), (3), (4))</b>                                               |                                                                                                                                                                    | 17                                                              | 0                                                                  |
| <b>f. Total Distribution (Sum of 15c and 15e)</b>                                                                               |                                                                                                                                                                    | 27688                                                           | 26276                                                              |
| <b>g. Copies not Distributed</b>                                                                                                |                                                                                                                                                                    | 0                                                               | 0                                                                  |
| <b>h. Total (Sum of 15f and 15g)</b>                                                                                            |                                                                                                                                                                    | 27688                                                           | 26276                                                              |
| <b>i. Percent Paid ((15c / 15f) times 100)</b>                                                                                  |                                                                                                                                                                    | 99.94 %                                                         | 100.00 %                                                           |
| <b>16. If total circulation includes electronic copies, report that circulation on lines below.</b>                             |                                                                                                                                                                    |                                                                 |                                                                    |
| <b>a. Paid Electronic Copies</b>                                                                                                |                                                                                                                                                                    | 0                                                               | 0                                                                  |
| <b>b. Total Paid Print Copies (Line 15c) + Paid Electronic Copies</b>                                                           |                                                                                                                                                                    | 0                                                               | 0                                                                  |
| <b>c. Total Print Distribution (Line 15f) + Paid Electronic Copies</b>                                                          |                                                                                                                                                                    | 0                                                               | 0                                                                  |
| <b>d. Percent Paid (Both Print and Electronic Copies)</b>                                                                       |                                                                                                                                                                    | 0.00 %                                                          | 0.00 %                                                             |
| <input type="checkbox"/> I certify that 50% of all my distributed copies (Electronic and Print) are paid above a nominal price. |                                                                                                                                                                    |                                                                 |                                                                    |

**17. Publication of Statement of Ownership**

If the publication is a general publication, publication of this statement is required. Will be printed in the 10/01/2024 issue of this publication.  Publication not required.

**18. Signature and Title of Editor, Publisher, Business Manager, or Owner**

|                                             |                        |
|---------------------------------------------|------------------------|
| <b>Title</b>                                | <b>Date</b>            |
| Brian Cole<br>Publishing Operations Manager | 09/05/2024 10:13:59 AM |

I certify that all information furnished on this form is true and complete. I understand that anyone who furnishes false or misleading information on this form or who omits material or information requested on the form may be subject to criminal sanctions (including fines and imprisonment) and/or civil sanctions (including civil penalties).

PS Form 3526, September 2007 (Page 2)

PRIVACY NOTICE: See our privacy policy on www.usps.com

# NEW TITLES FROM AMERICAN PSYCHIATRIC ASSOCIATION PUBLISHING

## The American Psychiatric Association Publishing Textbook of Geriatric Psychiatry, Sixth Edition

Edited by David C. Steffens, M.D., M.H.S., and Kristina F. Zdanys, M.D.

2023 • 848 pages • ISBN 978-1-61537-340-6 • Hardcover \$200.00 • Item #37340  
2023 • 848 pages • ISBN 978-1-61537-437-3 • eBook \$160.00 • Item #37437

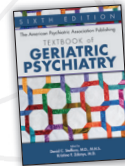

## Textbook of Hospital Psychiatry, Second Edition

Edited by Harsh K. Trivedi, M.D., M.B.A., and Steven S. Sharfstein, M.D., M.P.A.

2023 • 703 pages • ISBN 978-1-61537-345-1 • Hardcover \$155.00 • Item #37345  
2023 • 703 pages • ISBN 978-1-61537-440-3 • eBook \$124.00 • Item #37440

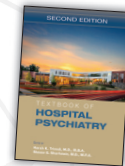

## The American Psychiatric Association Publishing Textbook of Mood Disorders, Second Edition

Edited by Charles B. Nemeroff, M.D., Ph.D., Alan F. Schatzberg, M.D., Natalie Rasgon, M.D., Ph.D., and Stephen M. Strakowski, M.D.

2022 • 986 pages • ISBN 978-1-61537-331-4 • Hardcover \$195.00 • Item #37331  
2022 • 986 pages • ISBN 978-1-61537-452-6 • eBook \$156.00 • Item #37452

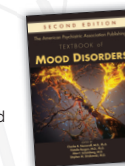

## Textbook of Psychiatric Administration and Leadership, Third Edition

Edited by Sy Saeed, M.D., M.S., FACP, John Lauriello, M.D., and Laura Weiss Roberts, M.D., M.A.

2023 • 544 pages • ISBN 978-1-61537-337-6 • Hardcover \$154.00 • Item #37337  
2023 • 544 pages • ISBN 978-1-61537-434-2 • eBook \$123.00 • Item #37434

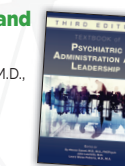

## Gabbard's Textbook of Psychotherapeutic Treatments, Second Edition

Edited by Holly Crisp, M.D., and Glen O. Gabbard, M.D.

2023 • 830 pages • ISBN 978-1-61537-326-0 • Hardcover \$145.00 • Item #37326  
2023 • 830 pages • ISBN 978-1-61537-406-9 • eBook \$116.00 • Item #37406

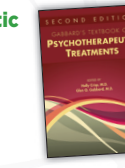

## Textbook of Antisocial Personality Disorder

Edited by Donald W. Black, M.D., and Nathan J. Kolla, M.D.

2022 • 535 pages • ISBN 978-1-61537-323-9 • Hardcover \$105.00 • Item #37323  
2022 • 535 pages • ISBN 978-1-61537-322-2 • eBook \$84.00 • Item #37322

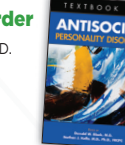

AMERICAN PSYCHIATRIC ASSOCIATION PUBLISHING

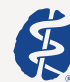

ORDER @ [www.appi.org](http://www.appi.org)  
Email: [appi@psych.org](mailto:appi@psych.org)  
Toll Free: 1-800-368-5777

20% Discount for American Psychiatric Association Members  
25% Discount for APA Resident-Fellow Members

AH2318B

# DSM-5-TR<sup>®</sup> DIAGNOSTIC CRITERIA APP

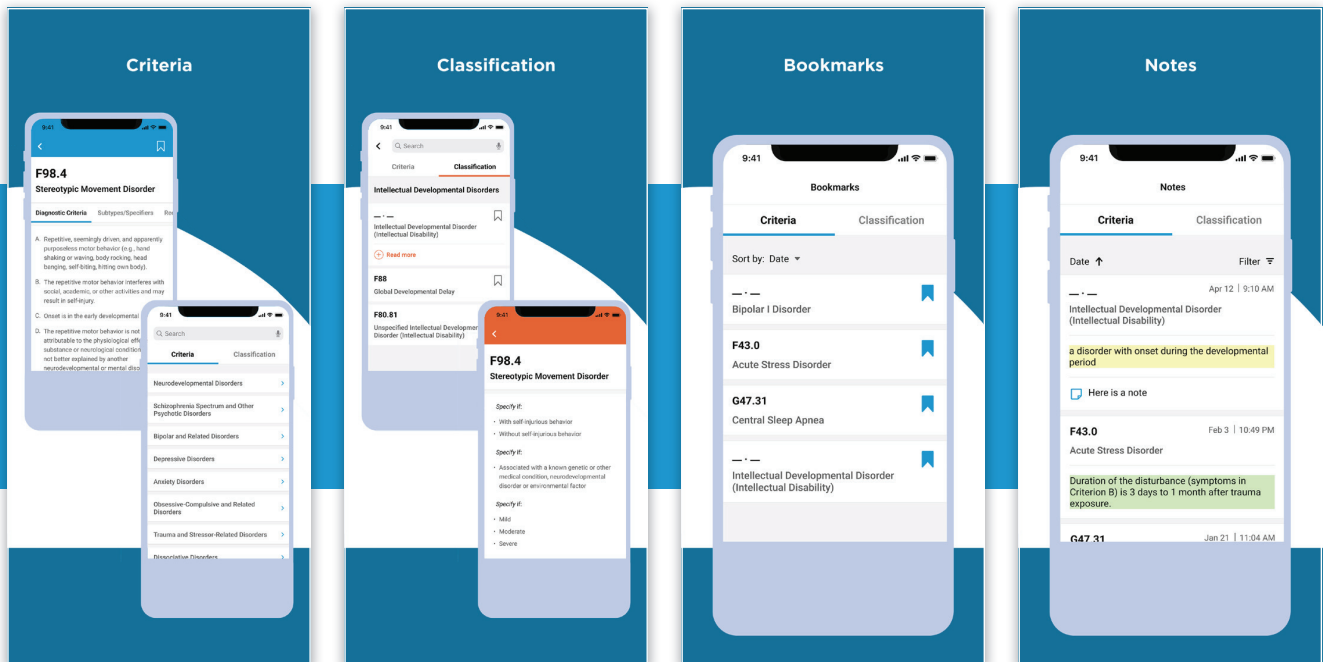

The new DSM-5-TR<sup>®</sup> Diagnostic Criteria Mobile App has been fully redesigned and is a concise companion to the ultimate psychiatric reference, *Diagnostic and Statistical Manual of Mental Disorders, Fifth Edition, Text Revision (DSM-5-TR<sup>®</sup>)*. It includes the fully revised diagnostic classification, as well as all the diagnostic criteria from DSM-5-TR<sup>®</sup> in an easy-to-use format. This handy reference provides mental health practitioners, researchers, and students quick access to the information essential to making a diagnosis.

## Features:

- Fully redesigned and updated user interface
- Improved presentation of tables and charts
- Dual-use modes for toggling between the diagnostic criteria and classification
- Up-to-date access to ICD-10-CM codes for clinical and administrative use
- Over 70 modified criteria sets with helpful clarifications since publication of DSM-5<sup>®</sup>
- Bookmark frequently used information and add notes for easy reference later.

Available for both **iOS** and **Android** compatible devices through the iTunes App store and Google Play.

## Subscription and Business Information

*The American Journal of Psychiatry*, ISSN 0002-953X, is published monthly by the American Psychiatric Association.

The American Psychiatric Association does not hold itself responsible for statements made in its publications by contributors or advertisers. Unless so stated, material in *The American Journal of Psychiatry* does not reflect the endorsement, official attitude, or position of the American Psychiatric Association or of the Journal's Editorial Board.

Periodicals postage paid at Washington, DC, and additional mailing offices. POSTMASTER: Send address changes to *The American Journal of Psychiatry*, Circulation Department, American Psychiatric Association, 800 Maine Avenue, S.W., Suite 900, Washington, D.C. 20024.

### Editorial Office

*American Journal of Psychiatry*  
American Psychiatric Association  
800 Maine Avenue, S.W., Suite 900  
Washington, D.C. 20024  
E-mail: [ajp@psych.org](mailto:ajp@psych.org)

### Customer Service

Phone: (800) 368-5777 (toll-free)  
E-mail: [appi@psych.org](mailto:appi@psych.org)

### APA Member Subscription Services

Phone: (888) 35-PSYCH (toll-free)

### Subscriptions

Regular and resident-fellow members in the U.S. receive print and online access as a **member benefit**. Subscriptions for non-members start at \$378 per year. Online only subscriptions start at \$342 per year. Go to <https://www.appi.org/ajp> for more information.

Institutional subscriptions are tier priced. For institutional site license or pricing information, contact (202) 559-3729 or [institutions@psych.org](mailto:institutions@psych.org).

*Additional subscription options, including single issues and student rates*  
Contact Customer Service

### Advertising

*Pharmaceutical Print and Online Advertising*  
Frank Cox, Kathleen Harrison, Tim Wolfinger  
Pharmaceutical Media, Inc.  
30 East 33rd Street  
New York, NY 10016  
Phone: (212) 904-0379  
E-mail: [twolfinger@pminy.com](mailto:twolfinger@pminy.com)

*Nonpharmaceutical and Online Sales*  
Eamon Wood  
Pharmaceutical Media, Inc.  
E-mail: [ewood@pminy.com](mailto:ewood@pminy.com)  
(see address and phone above).

### Permissions and Reprints

Material published in the journals of the American Psychiatric Association and American Psychiatric Association Publishing is protected by copyright and all rights are reserved. Material may not be reproduced in any form or by any means without written permission from the copyright owner. For permission to reproduce material published by APA, please visit <http://www.appi.org/customer-service/permissions> for more information. Permission can also be secured through the Copyright Clearance Center ([www.copyright.com](http://www.copyright.com)).

APA does not require that permission be obtained for the photocopying of isolated articles for nonprofit classroom or library reserve use; all fees associated with such permission are waived. This consent does not extend to other kinds of copying, such as copying for general distribution, for advertising or promotional purposes, for creating new collective works, or for resale. Requests for commercial distribution and bulk reprints should be directed to (202) 609-7075.

Indexed in Abstracts for Social Workers, Academic Abstracts, Biological Abstracts, Chemical Abstracts, Chicago Psychoanalytic Literature Index, Cumulative Index to Nursing Literature, Excerpta Medica, Hospital Literature Index, Index Medicus, International Nursing Index, Nutrition Abstracts, Psychological Abstracts, Science Citation Index, Social Science Source, and Social Sciences Index.

Pages are produced by TNQ Technologies (Chennai, India) effective with Volume 179, Number 3, March 2022, and printed by Sheridan NH (Hanover, NH) on acid-free paper effective with Volume 169, Number 1, January 2012.

© 2024 American Psychiatric Association.

A breakthrough over 3 decades in the making

# A NEW CLASS FOR THE TREATMENT OF SCHIZOPHRENIA IS HERE

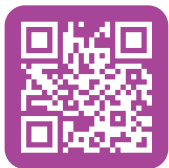

For more information,  
go to [treatscz.com](https://treatscz.com)
