# The American Journal of Psychiatry

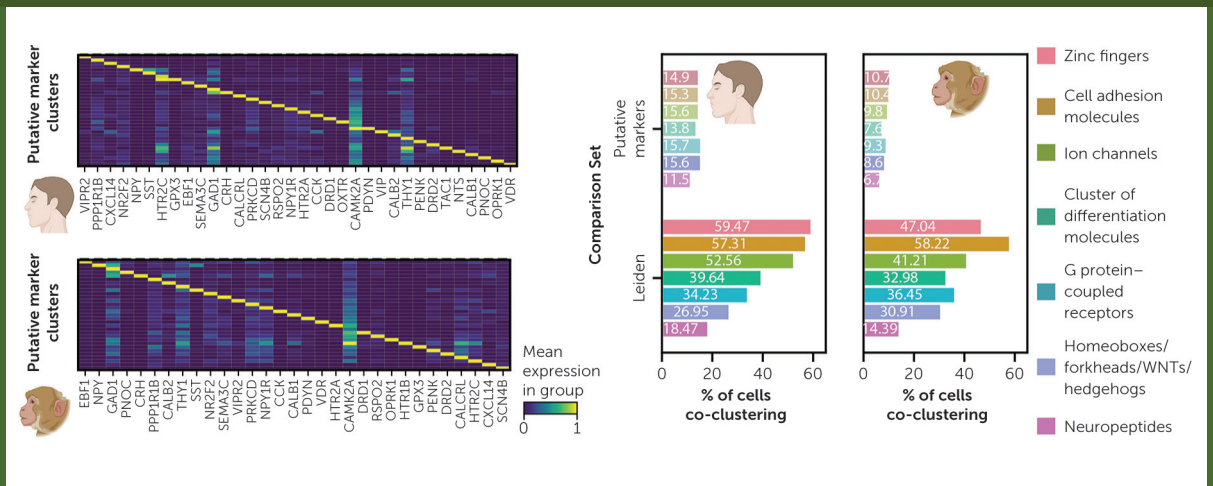

Translational Insights From Cell Type Variation Across Amygdala Subnuclei in Rhesus Monkeys and Humans

Novel Pharmacologic and Other Somatic Treatment Approaches for Posttraumatic Stress Disorder in Adults

Pathways to Homelessness: Childhood Maltreatment and Psychiatric Symptoms Increase Risk of Homelessness

Discrimination Exposure, Neural Reactivity to Stress, and Psychological Distress
